# Supplementary material for: Serum-mediated Activation of Bone Marrow–derived Mesenchymal Stem Cells in Ischemic Stroke Patients: A Novel Preconditioning Method
Source: PubMed Central journal article supplement — Cell Transplant. 2018 May 18;27(3):485–500. doi: 10.1177/0963689718755404 (PMC6038038; doi:10.1177/0963689718755404), 2018-05-18
Supplement: Suppl_for_CT_1763_R2.pdf [file Suppl_for_CT_1763_R2.pdf]

## ***Supplemental Data***

### ***Material and Methods***

#### ***Preparation of serum and mesenchymal stem cells from rats***

Serum was prepared from tMCAo rat stroke animal models (RSS) and normal rats (RNS). The blood was collected by cardiac puncture, from the still-beating heart, with a 5-mL syringe.

Rat MSCs (rMSCs) were obtained from femora and tibias of Sprague Dawley rats (male, weighing 220–250 g, n=10–13), as previously described<sup>1</sup>.

The rMSCs were characterized by flow cytometry analysis, and their expression levels of CD90, CD29 (positive surface marker, BD Biosciences), CD45, and CD11b (negative surface marker, BD Biosciences) were evaluated by flow cytometry (FACS Calibur; BD Biosciences).

#### ***Real-time quantitative PCR for rat trophic factors***

Total RNA was extracted using Trizol™ (GIBCO). cDNA was synthesized from 2 µg of total RNA using oligo d(T)<sub>16</sub> primers and the Omniscript RT-kit (Qiagen). For quantitative real-time PCR analysis of *VEGF*, *GDNF*, *FGF2*, and *GAPDH*, TaqMan assays were performed using TaqMan gene expression Master Mix (Thermo Fisher Scientific) on an ABI Prism 7900 Real-time PCR system (Applied Biosystems). Primers and probes were obtained commercially (Thermo Fisher Scientific) and are described in Table S1.

#### ***Cell cycle analysis***

Cells were collected and fixed with ice-cold 90% ethanol that was added dropwise during vortexing. The fixation reaction was allowed to proceed for 1–24 hours while the cells were kept at 4°C. Cells were then collected by centrifugation, re-suspended in phosphate buffered saline (PBS) containing 0.1% Triton X-100 and 20 µg/mL RNase, and incubated for 30 minutes at 37°C. Propidium iodide was added to a final concentration of 50 µg/mL, and cells were analyzed by flow cytometry. To measure cell cycle distribution, 10,000 MSCs were obtained with Cell Quest software and analyzed with Modfit software<sup>2</sup>. The length of the G<sub>0</sub>/G<sub>1</sub> phase was calculated using the following equation:  $T_{(G_0/G_1)} = [T_{(C)} \times \ln(F_{(G_0/G_1)} + 1)] / \ln 2$ , where

$T_{(G0/G1)}$  and  $T_{(C)}$  are the duration of the G0/G1 phase and the doubling time, respectively, and  $F_{(G0/G1)}$  is the percentage of cells in the G0/G1 phase<sup>3</sup>.

### ***Analysis of cell death***

For FCM analysis to determine cell death, rMSCs were stained with Annexin V-FITC (BD Biosciences) and propidium iodide (PI, Sigma), following the manufacturer's staining protocol. Briefly, 100  $\mu$ L of cell suspension ( $1 \times 10^5$  cells in 1X binding buffer) were stained with 2.5  $\mu$ L of Annexin V-FITC and 5  $\mu$ L of PI (50  $\mu$ g/mL), mixed gently, and incubated for 15 min at room temperature in the dark, following which 200  $\mu$ L of 1X Annexin binding buffer were added and the cells were immediately analyzed by flow cytometry. FCM analysis was performed using a FACS Calibur flow cytometer. Data for 10,000 cells were collected at a low flow rate and analyzed using CellQuest software (BD Biosciences). The Annexin V-FITC signal was detected using an FL1 detector and PI was detected by an FL2 detector. Discrimination between living, necrotic, and apoptotic cells was based on changes in the phosphatidylserine asymmetry of the cell membrane, as detected by Annexin V binding. Analyses of the cell death process using simultaneous staining with FITC-Annexin V (green fluorescence) and non-vital dye PI (red fluorescence) allowed the discrimination between intact cells (FITC<sup>-</sup>/PI<sup>-</sup>), early apoptotic cells (FITC<sup>+</sup>/PI<sup>-</sup>), and late apoptotic or necrotic cells (FITC<sup>+</sup>/PI<sup>+</sup>).

## ***Results***

### ***Phenotypic characterization of MSCs***

The phenotypic characteristics of rMSCs were compared after they had been cultured using different media; BM-MSCs were expanded in 10% FBS, 10% RNS, or 10% RSS. The morphology of rMSCs did not differ between groups (Fig. S2A). rMSCs cultured with RNS or RSS had a significantly higher cumulative population doubling level (CPDL) compared with those cultured in FBS (Fig. S2B, \*\*  $p < 0.01$ ). All rMSCs were CD90-, CD73-positive ( $\geq 95\%$  positive) and CD34-, CD45-negative ( $\leq 1\%$  positive) (Fig. S2C).

To compare whether RSS improves trophic factor gene expression levels, rMSCs were cultured with various serum sources. rMSCs cultured with RSS (RSS-rMSCs) showed significantly

greater expression of VEGF and FGF2 than BM-MSCs cultured with FBS (FBS-rMSCs) or RNS (RNS-rMSCs) (Fig. S2D, F, \*\*  $p < 0.01$ ). GDNF was significantly more greatly expressed in RSS-rMSCs than in FBS-rMSCs (Fig. S2E, \*\*  $p < 0.01$ ).

### ***Proliferative capacity of rMSCs***

To compare the proliferative capacities of RSS-rMSCs collected at different time points after stroke, rMSCs were cultured for passages 2–4. FBS-rMSCs showed the lowest population doubling level (Fig. S3A). The CPDL at P4 of RSS-rMSCs (mean $\pm$ SEM, 1 d 2.70 $\pm$ 0.03, 7 d 2.84 $\pm$ 0.01, 14 d 2.88 $\pm$ 0.04, 28 d 2.84 $\pm$ 0.03, 60 d 2.53 $\pm$ 0.03, 90 d 2.53 $\pm$ 0.03) was significantly higher than those of FBS-rMSCs (mean $\pm$ SEM, 1.63 $\pm$ 0.12) or RNS-rMSCs (mean $\pm$ SEM, 2.17 $\pm$ 0.02) (\*  $p < 0.05$ , \*\*  $p < 0.01$ , respectively). Population doubling times (PDTs) of RNS-rMSCs and RSS-rMSCs remained at low levels, but increased with the passage number of the FBS-rMSCs. The PDT of FBS-rMSCs increased with culture expansion; the PDT of FBS-rMSCs was around 60 h at P2, and increased to 88 h by P4. In contrast, the PDT of RSS-rMSCs retained a short doubling time of 31–45 h. Similar results were obtained for RNS-rMSCs (approximately 43–62 h) (Fig. S3B, \*  $p < 0.05$ , \*\*  $p < 0.01$ ).

Cell cycle analyses using FCM analysis showed different distributions in the cell cycle, depending on the serum source. Specifically, a greater population of cells that were cultured with RSS occupied the proliferating phase of the cell cycle at P3 (S/G2-M phase) compared with FBS- rMSCs or RNS-rMSCs (Fig. S3C, \*  $p < 0.05$ , \*\*  $p < 0.01$ ), except in the RSS culture after 28 d ( $p = 0.065$ ). Based on PDT and cell cycle distribution, we calculated the duration of G0/G1. The average duration of the G0/G1 phase in FBS-rMSCs increased from approximately 53 h at P2 to 77 h at P4. Notably, a shortening of the duration of the G0/G1 phase was observed in cells cultured with RSS in consecutive divisions (with a range of 26–37 h, Fig. S3D, \*  $p < 0.01$ ).

### ***Survival and cellular senescence of MSCs***

To examine whether RSS improves the survival of rMSCs under toxic ischemic brain conditions, rMSCs were treated with ischemic brain-conditioned media, including 20% IBE, after which cell viability was measured. FCM analysis showed that fewer apoptotic cells (Annexin V positive) and necrotic cells (PI positive) were observed among RSS-rMSCs, compared to FBS-rMSCs or RNS-rMSCs (Fig. S4A). The effects of the RSS on MSC survival

in ischemic brain conditions were more prominent when rMSCs were cultured with serum obtained at 1 day after tMCAo (Fig. S4B, \*  $p < 0.01$ ).

In addition, the effect of RSS on cellular senescence was evaluated using SA- $\beta$ -gal staining, a senescence marker (Fig. S4C). Approximately 42% of rMSCs cultured with FBS revealed senescence-associated changes at P6. The proportion of SA- $\beta$ -gal-positive cells was significantly lower among RNS- rMSCs or RSS-rMSCs than among FBS-rMSCs (Fig. S4D, \*  $p < 0.01$ ).

Our data show that culture expansion using RSS enhances rMSC survival under toxic ischemic conditions. One of the limiting factors is poor local survival of transplanted stem cells. Only a few transplanted MSCs and newly formed neurons in the infarcted hemisphere died within several weeks<sup>1, 4, 5</sup>. Poor vascular and microenvironmental conditions, including increased tissue levels of free radicals, excitotoxic neurotransmitters, and proinflammatory cytokines, might threaten transplanted cells migrating into the peri-infarct region. In addition, MSCs provide trophic support to the ischemic brain, which can be enhanced by ex vivo administration of trophic factors<sup>6</sup> or preconditioning during the cultivation of MSCs<sup>7, 8</sup>.

*hMSC culture*

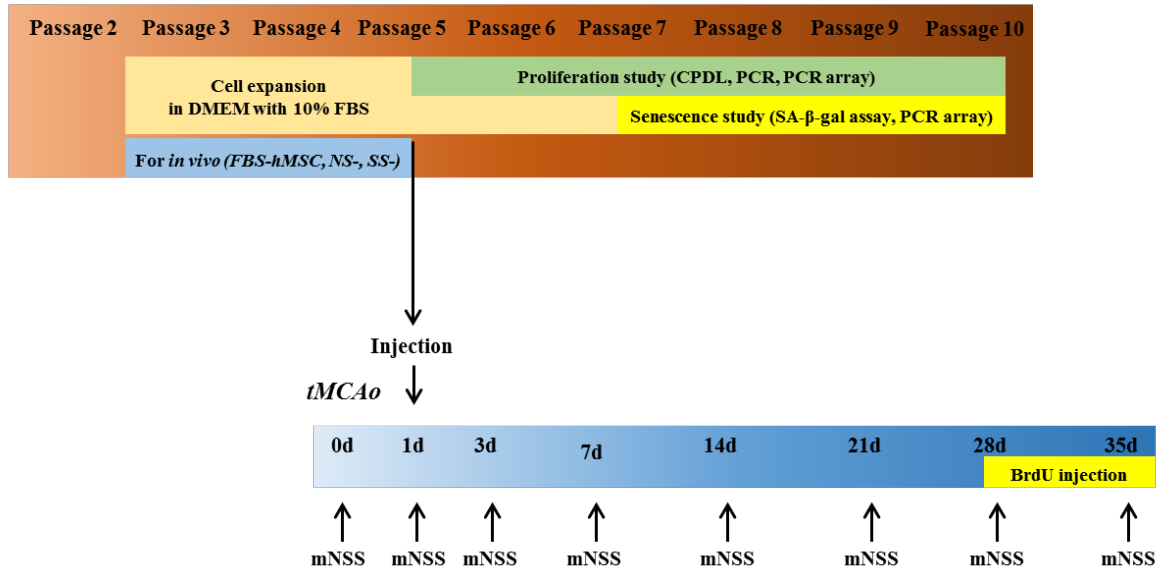

**Figure 1.** *Experimental time line*

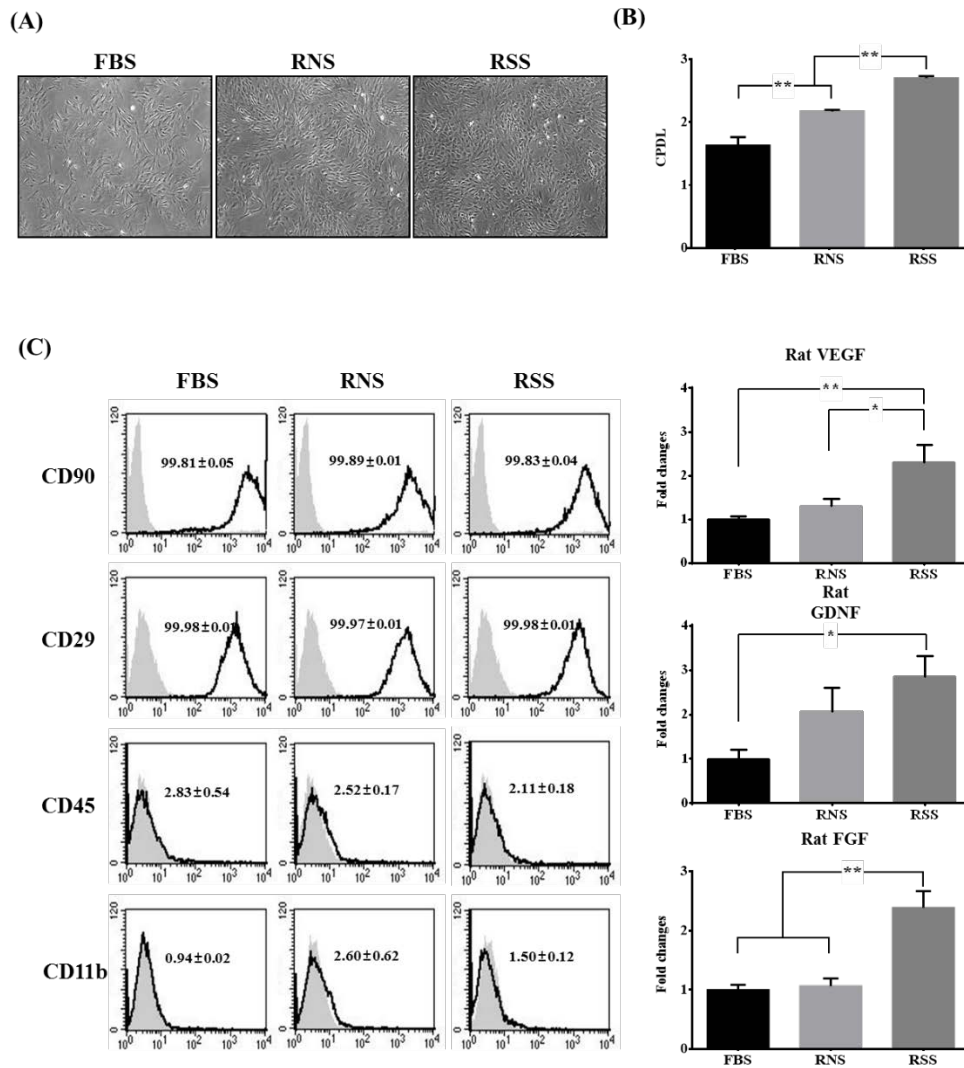

## Figure 2. Evaluation of phenotypic characteristics of MSCs

Representative phase contrast images of rMSCs expanded with the different types of serum. (B) PDL of rMSCs cultured with FBS, RNS, and RSS. (C) FACS analysis of rMSCs cultured with different types of serum. Quantitative analysis of the percentages of cells expressing CD90, CD29 (positive markers), and CD45, CD11b (negative markers). The relative expression levels of both (D) rat VEGF and (E) rat GDNF were significantly higher in rMSCs cultured with allogeneic serum culture (RNS, RSS) than with FBS. (F) The relative expression level of rat FGF was significantly higher in RSS- than in FBS or RNS. Data are presented as mean  $\pm$  SEM (\*  $p < 0.05$ , \*\*  $p < 0.01$ ,  $n = 4 \sim 6$ ).

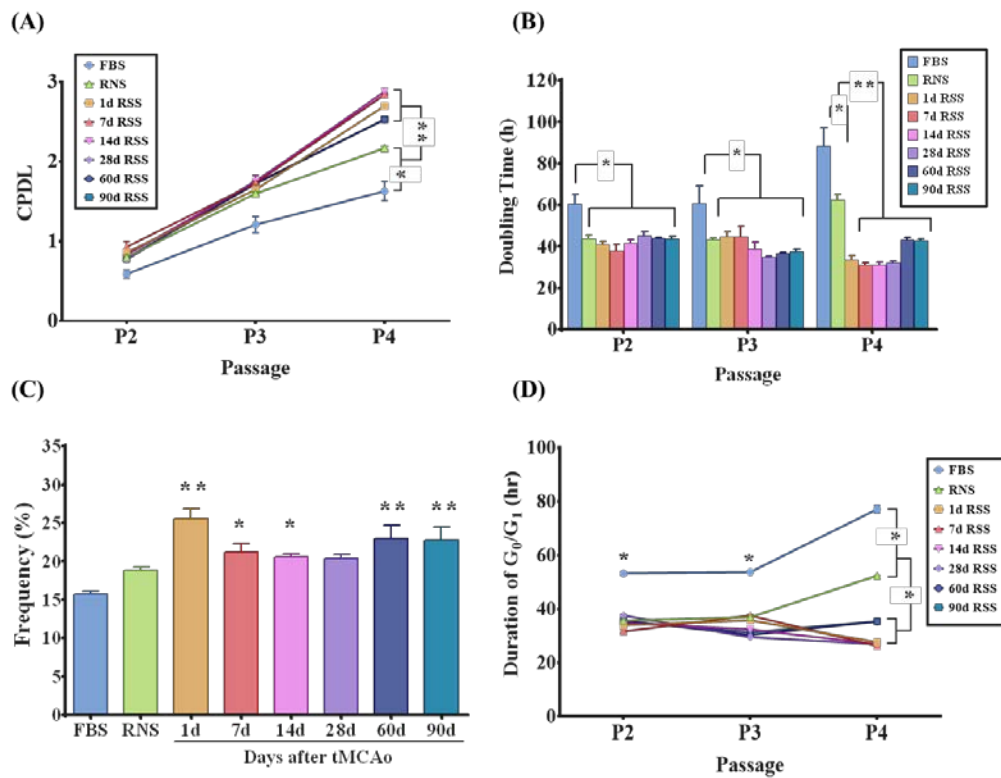

**Figure 3. Proliferative properties of rMSCs cultured with different types of serum from P2 to P4.**

(A) Cumulative population doubling levels (CPDLs) were determined in different types of serum. (B) Cell doubling time was calculated for rMSCs cultured with FBS, RNS, and RSS (1, 7, 14, 28, 60, and 90 days after tMCAo). (C) A comparison of proliferative phase frequency (S phase + G2/M phase) of rMSCs cultured with different serum at P3. (D) Calculation of G0/G1 phase length from population number and cell cycle data from P2-4. Results are presented as mean±SEM (\*  $p < 0.05$ , \*\*  $p < 0.01$ ,  $n = 4 \sim 6$ ).

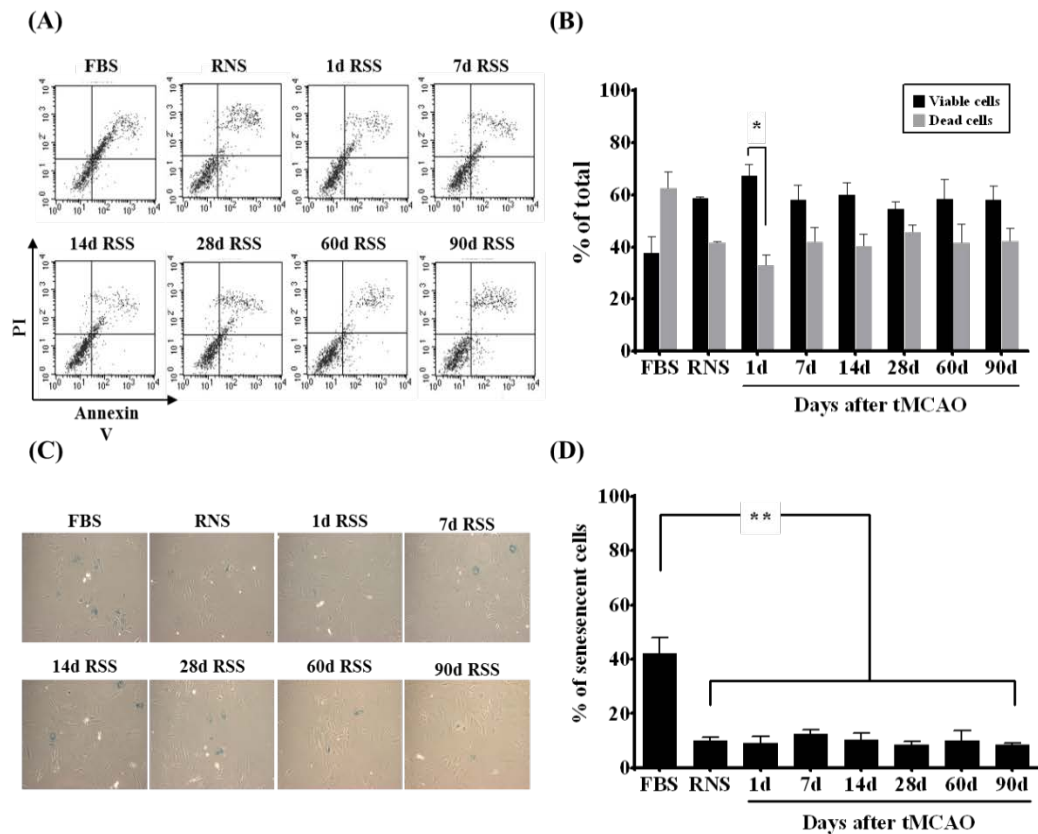

**Figure 4. Cell viability in ischemic brain conditions and senescence of rMSCs**

rMSCs cultured with FBS, RNS, or RSS (1, 7, 14, 28, 60, and 90 days after stroke) were exposed to 20% IBE for 24 h at P4. (A) Representative scatter plots showing the distributions of Annexin V and PI staining. Cells are classified as “viable” (bottom left), “apoptotic” (bottom right), or “necrotic” (top left and right). (B) Quantitative analysis of cell viability, presented as the percentage of viable and dead (apoptotic+necrotic) cells at P4 by FCM analysis. The data are presented as mean±SEM (\* *p*<0.05, n=4~6). (C) rMSCs were stained with β-galactosidase staining solution. Representative images of SA-β-Gal staining. (D) Quantitative analysis of senescence, expressed as the percentage of positively stained cells at P6. The absolute number of blue stained cells was counted in 6 fields per well. The data are presented as mean±SEM (\*\* *p*<0.01, n=3).



**Table 1.** PCR primer for Real-time qPCR

| Gene         | Product Name         |                |
|--------------|----------------------|----------------|
|              | Rat                  | Human          |
| <i>VEGF</i>  | <i>Rn01511605_m1</i> | <i>P128356</i> |
| <i>GDNF</i>  | <i>Rn00569510_m1</i> | <i>P171077</i> |
| <i>FGF2</i>  | <i>Rn00570809_m1</i> | <i>P111196</i> |
| <i>GAPDH</i> | <i>4352338E</i>      | <i>P267613</i> |

**Table 2.** List of differentially expressed serum proteins ( $p < 0.05$ ) between healthy subjects and stroke patients

| No | Proteins        | Stroke/Normal |         | UniProt |
|----|-----------------|---------------|---------|---------|
|    |                 | Fold change   | p-value |         |
| 1  | Activin C       | 1.503         | 0.037   | P36896  |
| 2  | Activin RIA     | 1.696         | 0.015   | Q13705  |
| 3  | Activin RIB     | 2.081         | 0.014   | P27037  |
| 4  | Activin RII A/B | 1.558         | 0.006   | Q15848  |
| 5  | Angiogenin      | 1.802         | 0.021   | O15123  |
| 6  | Angiopoietin-1  | 1.712         | 0.008   | Q9Y264  |
| 7  | Amphiregulin    | 1.693         | 0.002   | P30530  |
| 8  | Artemin         | 1.897         | 0.006   | P33681  |
| 9  | BDNF            | 1.875         | 0.013   | Q07812  |
| 10 | CXCL13          | 1.686         | 0.011   | P12645  |
| 11 | BMP-5           | 1.803         | 0.029   | P18075  |
| 12 | BMP-8           | 1.713         | 0.008   | P36894  |
| 13 | BMP-15          | 1.805         | 0.012   | O00238  |
| 14 | BMPR-IB         | 2.303         | 0.006   | P35070  |
| 15 | BTC             | 1.638         | 0.029   | Q16627  |
| 16 | CCL14           | 2.138         | 0.027   | P32246  |
| 17 | CCR7            | 4.252         | 0.026   | P51686  |
| 18 | CD40L           | 2.368         | 0.045   | O95813  |
| 19 | CRIM 1          | 2.147         | 0.034   | Q9Y5Y4  |
| 20 | Cripto-1        | 2.737         | 0.047   | Q9GZR3  |
| 21 | CD152           | 1.855         | 0.012   | O95715  |
| 22 | Crossveinless-2 | 1.580         | 0.039   | Q9H2A7  |
| 23 | CXCR6           | 2.482         | 0.015   | P41271  |
| 24 | DANCE           | 1.878         | 0.017   | P07585  |
| 25 | DcR3            | 1.795         | 0.041   | O94907  |

|    |                         |       |       |        |
|----|-------------------------|-------|-------|--------|
| 26 | Dkk-4                   | 1.628 | 0.019 | O75509 |
| 27 | EGF                     | 1.868 | 0.007 | P58294 |
| 28 | EMAP-II                 | 2.063 | 0.007 | Q9NQ30 |
| 29 | CD105                   | 1.566 | 0.018 | P05305 |
| 30 | CCL26                   | 2.282 | 0.047 | P04626 |
| 31 | Epiregulin              | 1.785 | 0.008 | P21860 |
| 32 | ErbB3                   | 2.250 | 0.031 | P01588 |
| 33 | ErbB4                   | 2.169 | 0.007 | P16581 |
| 34 | E-Selectin              | 1.909 | 0.036 | P58499 |
| 35 | Fas Ligand              | 2.603 | 0.028 | Q14512 |
| 36 | FGF Basic               | 2.312 | 0.038 | P22607 |
| 37 | FGF-BP                  | 1.648 | 0.010 | P22455 |
| 38 | FGF-5                   | 2.145 | 0.014 | P21781 |
| 39 | FGF-12                  | 1.783 | 0.013 | O43320 |
| 40 | FGF-23                  | 1.675 | 0.030 | P36888 |
| 41 | Flt-3 Ligand            | 2.608 | 0.008 | Q12841 |
| 42 | Frizzled-1              | 1.651 | 0.042 | Q9ULV1 |
| 43 | Frizzled-4              | 1.997 | 0.005 | O60353 |
| 44 | Galectin-3              | 2.112 | 0.013 | Q96NZ8 |
| 45 | GASP-2                  | 1.650 | 0.039 | P09919 |
| 46 | Glut1                   | 1.815 | 0.029 | P11169 |
| 47 | Glypican 5              | 1.704 | 0.007 | P15509 |
| 48 | Granzyme A              | 1.756 | 0.040 | P12544 |
| 49 | Growth Hormone          | 1.948 | 0.024 | Q99075 |
| 50 | CRAM-A/B                | 1.972 | 0.001 | Q04760 |
| 51 | Hepassocin              | 2.031 | 0.004 | P14210 |
| 52 | IFN- $\gamma$ R1        | 1.968 | 0.045 | P18065 |
| 53 | IGF-II                  | 2.332 | 0.004 | P01583 |
| 54 | IL-1F10                 | 1.659 | 0.042 | Q01638 |
| 55 | IL-1 sRII               | 1.696 | 0.013 | P01589 |
| 56 | IL-2R $\beta$           | 1.601 | 0.036 | P08700 |
| 57 | IL-12 p40               | 1.519 | 0.034 | P42701 |
| 58 | IL-12 p70               | 1.563 | 0.022 | Q99665 |
| 59 | IL-15R $\alpha$         | 1.892 | 0.027 | Q16552 |
| 60 | IL-17                   | 2.300 | 0.030 | Q9NRM6 |
| 61 | IL-17D                  | 1.815 | 0.020 | Q96PD4 |
| 62 | IL-20                   | 2.099 | 0.035 | Q6UXL0 |
| 63 | Kininostatin            | 1.872 | 0.032 | Q8NCW0 |
| 64 | Kremen-1                | 2.061 | 0.015 | P22064 |
| 65 | Latent TGF- $\beta$ bp1 | 1.562 | 0.021 | P06239 |

|    |                 |       |       |        |
|----|-----------------|-------|-------|--------|
| 66 | Lipocalin-2     | 3.520 | 0.011 | O75581 |
| 67 | MCP-1           | 1.778 | 0.016 | P80098 |
| 68 | MFRP            | 1.742 | 0.028 | P14174 |
| 69 | MIG             | 2.299 | 0.045 | P13236 |
| 70 | MIP-1 $\alpha$  | 1.772 | 0.010 | Q16663 |
| 71 | MMP-9           | 3.125 | 0.010 | P24347 |
| 72 | OSM             | 1.956 | 0.019 | P61366 |
| 73 | Osteoprotegerin | 2.217 | 0.049 | P55774 |
| 74 | P-selectin      | 1.927 | 0.019 | Q9Y6Q6 |
| 75 | RAGE            | 1.874 | 0.014 | P13501 |
| 76 | ROBO4           | 1.975 | 0.023 | P60903 |
| 77 | S100 A8/A9      | 3.171 | 0.016 | P0DJI8 |
| 78 | sgp130          | 1.828 | 0.023 | O15389 |
| 79 | Soggy-1         | 1.535 | 0.048 | P09486 |
| 80 | Spinesin        | 1.771 | 0.031 | Q92583 |
| 81 | TLR1            | 1.830 | 0.028 | O15455 |
| 82 | Tomoregulin-1   | 2.124 | 0.011 | P01375 |
| 83 | TNF- $\beta$    | 1.945 | 0.020 | P20333 |
| 84 | TRADD           | 2.959 | 0.009 | O00220 |
| 85 | TRAIL R2        | 2.061 | 0.041 | Q9UBN6 |
| 86 | TSG-6           | 1.776 | 0.021 | O43508 |
| 87 | VEGF            | 2.065 | 0.038 | P35916 |
| 88 | VEGF-D          | 1.796 | 0.026 | Q9Y5W5 |

**Table S3.** List of differentially expressed paracrine proteins ( $p < 0.05$ ) between healthy subjects and stroke patients

| No | Proteins   | Stroke/Normal |         | UniProt |
|----|------------|---------------|---------|---------|
|    |            | Fold change   | p-value |         |
| 1  | Activin A  | 3.95          | 0.045   | P08476  |
| 2  | Artemin    | 2.43          | 0.034   | Q5T4W7  |
| 3  | BMP-2      | 1.66          | 0.042   | P12643  |
| 4  | CCN3       | 1.82          | 0.003   | P48745  |
| 5  | Cerberus 1 | 1.99          | 0.006   | O95813  |
| 6  | CTGF       | 1.91          | 0.027   | P29279  |
| 7  | CXCL7      | 2.41          | 0.049   | P02775  |
| 8  | EDA2R      | 1.94          | 0.007   | Q9HAV5  |
| 9  | FACX       | 1.84          | 0.037   | P00742  |
| 10 | FGF-11     | 1.74          | 0.038   | Q92914  |

|    |                    |      |       |        |
|----|--------------------|------|-------|--------|
| 11 | Fractalkine        | 2.30 | 0.023 | P78423 |
| 12 | GFR alpha-1        | 1.64 | 0.049 | P56159 |
| 13 | Grb2               | 2.00 | 0.027 | P62993 |
| 14 | IGFBP-1            | 2.14 | 0.051 | P08833 |
| 15 | IGFBP-4            | 1.78 | 0.035 | P22692 |
| 16 | IGFBP-6            | 1.76 | 0.016 | P24592 |
| 17 | IL-1 R3            | 1.83 | 0.009 | Q9NPH3 |
| 18 | IL-12 R beta 2     | 1.60 | 0.013 | Q99665 |
| 19 | IL-15 R alpha      | 2.55 | 0.012 | Q13261 |
| 20 | IL-17B             | 2.98 | 0.042 | Q9UHF5 |
| 21 | IL-17F             | 1.85 | 0.032 | Q96PD4 |
| 22 | IL-21 R            | 1.92 | 0.039 | Q9HBE5 |
| 23 | IL-24              | 1.92 | 0.005 | Q13007 |
| 24 | IL-31 RA           | 1.90 | 0.017 | Q8NI17 |
| 25 | IL-36G             | 1.94 | 0.002 | Q9NZH8 |
| 26 | Kininostatin       | 3.70 | 0.010 | P01042 |
| 27 | LECT2              | 2.02 | 0.031 | O14960 |
| 28 | Lep                | 1.85 | 0.002 | P41159 |
| 29 | LIF                | 1.66 | 0.039 | P15018 |
| 30 | LRP-1              | 2.50 | 0.041 | Q07954 |
| 31 | Lymphotoxin beta R | 1.83 | 0.025 | P36941 |
| 32 | MAC-1              | 1.69 | 0.043 | P11215 |
| 33 | MCP-1              | 1.91 | 0.051 | P13500 |
| 34 | MIP-1delta         | 1.79 | 0.017 | Q16663 |
| 35 | MIP-2              | 1.85 | 0.026 | P19875 |
| 36 | MIP-3 alpha        | 2.00 | 0.045 | P78556 |
| 37 | MIP-3 beta         | 1.87 | 0.017 | Q99731 |
| 38 | MMP-13             | 1.64 | 0.002 | P45452 |
| 39 | MMP-14             | 1.51 | 0.019 | P50281 |
| 40 | MMP-16             | 1.58 | 0.006 | P51512 |
| 41 | MMP-3              | 1.89 | 0.006 | P08254 |
| 42 | MMP-7              | 1.76 | 0.007 | P09237 |
| 43 | Neurturin          | 1.60 | 0.013 | Q99748 |
| 44 | NGF R              | 1.87 | 0.042 | P08138 |
| 45 | Nidogen-1          | 1.82 | 0.009 | P14543 |
| 46 | Neurotrophin-4     | 2.53 | 0.040 | P34130 |
| 47 | Orexin A           | 2.40 | 0.042 | O43612 |
| 48 | Osteoprotegerin    | 2.07 | 0.049 | O00300 |
| 49 | OX40 Ligand        | 1.85 | 0.025 | P23510 |
| 50 | PD-ECGF            | 1.53 | 0.007 | P19971 |

|    |                                     |      |       |                   |
|----|-------------------------------------|------|-------|-------------------|
| 51 | PDGF R beta                         | 1.66 | 0.027 | P09619            |
| 52 | PDGF-AA                             | 2.09 | 0.022 | P04085            |
| 53 | PDGF-BB                             | 2.60 | 0.047 | P01127            |
| 54 | PDGF-C                              | 2.00 | 0.029 | Q9NRA1            |
| 55 | Peroxiredoxin 6 (Prdx6)             | 2.04 | 0.012 | P30041            |
| 56 | PLUNC                               | 1.89 | 0.004 | Q9NP55            |
| 57 | Prolactin                           | 1.53 | 0.027 | P01236            |
| 58 | P-selectin                          | 1.58 | 0.023 | P16109            |
| 59 | RAGE                                | 2.09 | 0.007 | Q15109            |
| 60 | RELM beta                           | 2.28 | 0.036 | Q9BQ08            |
| 61 | S100 A8/A9                          | 2.31 | 0.050 | P05109,<br>P06702 |
| 62 | Secreted frizzled-related protein 1 | 1.93 | 0.007 | Q8N474            |
| 63 | Secreted frizzled-related protein 4 | 1.97 | 0.012 | Q6FHJ7            |
| 64 | sFRP-3                              | 2.90 | 0.043 | Q92765            |
| 65 | Sonic Hedgehog (Shh N-terminal)     | 2.54 | 0.019 | Q15465            |
| 66 | TGF-beta RII                        | 2.02 | 0.047 | P37173            |
| 67 | TGF-beta RIII                       | 1.70 | 0.033 | Q03167            |
| 68 | Thrombopoietin (TPO)                | 1.79 | 0.001 | P40225            |
| 69 | Thyroid Peroxidase                  | 1.67 | 0.003 | P07202            |
| 70 | TIMP-2                              | 4.85 | 0.009 | P16035            |
| 71 | TL1A / TNFSF15                      | 1.72 | 0.022 | O95150            |
| 72 | TLR1                                | 1.76 | 0.024 | Q15399            |
| 73 | TLR2                                | 1.89 | 0.031 | O60603            |
| 74 | TLR3                                | 1.75 | 0.015 | O15455            |
| 75 | TMPRSS5                             | 1.83 | 0.021 | Q9H3S3            |
| 76 | TRADD                               | 1.54 | 0.022 | Q15628            |
| 77 | TRAIL R3                            | 2.03 | 0.027 | O14798            |
| 78 | TRAIL R4                            | 1.79 | 0.040 | Q9UBN6            |
| 79 | TRAIL                               | 2.36 | 0.028 | P50591            |
| 80 | TROY                                | 1.57 | 0.012 | Q9NS68            |
| 81 | Vasorin                             | 1.65 | 0.031 | Q6EMK4            |
| 82 | VCAM-1                              | 2.00 | 0.002 | P19320            |
| 83 | VE-Cadherin                         | 1.82 | 0.037 | P33151            |
| 84 | KDR                                 | 1.93 | 0.011 | P35968            |
| 85 | VEGF R3                             | 1.95 | 0.005 | P35916            |
| 86 | VEGFA                               | 1.97 | 0.018 | P15692            |

**Table 4.** Checklist of Methodological and Reporting Aspects

| Methodological and Reporting Aspects   | Description of Procedures                                                                                                                                                                                                                                                                                                                                                                                                                                                                                                                                                                                                                                                                                                                                                                       |
|----------------------------------------|-------------------------------------------------------------------------------------------------------------------------------------------------------------------------------------------------------------------------------------------------------------------------------------------------------------------------------------------------------------------------------------------------------------------------------------------------------------------------------------------------------------------------------------------------------------------------------------------------------------------------------------------------------------------------------------------------------------------------------------------------------------------------------------------------|
| Experimental groups and study timeline | <ul style="list-style-type: none"> <li>☒ The experimental group(s) have been clearly defined in the article, including number of animals in each experimental arm of the study.</li> <li>☒ An account of the control group is provided, and number of animals in the control group has been reported. If no controls were used, the rationale has been stated.</li> <li>☒ An overall study timeline is provided. (supplementary figure)</li> </ul>                                                                                                                                                                                                                                                                                                                                              |
| Inclusion and exclusion criteria       | <ul style="list-style-type: none"> <li>☒ A priori inclusion and exclusion criteria for tested animals were defined and have been reported in the article.</li> </ul>                                                                                                                                                                                                                                                                                                                                                                                                                                                                                                                                                                                                                            |
| Randomization                          | <ul style="list-style-type: none"> <li>☒ Animals were randomly assigned to the experimental groups. If the work being submitted does not contain multiple experimental groups, or if random assignment was not used, adequate explanations have been provided.</li> <li>☒ Type and methods of randomization have been described.</li> <li>☒ Methods used for allocation concealment have been reported.</li> </ul>                                                                                                                                                                                                                                                                                                                                                                              |
| Blinding                               | <ul style="list-style-type: none"> <li>☒ Blinding procedures have been described with regard to masking of group/treatment assignment from the experimenter. The rationale for nonblinding of the experimenter has been provided, if such was not feasible.</li> <li>☒ Blinding procedures have been described with regard to masking of group assignment during outcome assessment.</li> </ul>                                                                                                                                                                                                                                                                                                                                                                                                 |
| Sample size and power calculations     | <ul style="list-style-type: none"> <li>☒ Formal sample size and power calculations were conducted based on a priori determined outcome(s) and treatment effect, and the data have been reported. OR A formal size assessment was not conducted and a rationale has been provided.</li> </ul>                                                                                                                                                                                                                                                                                                                                                                                                                                                                                                    |
| Data reporting and statistical methods | <ul style="list-style-type: none"> <li>☒ Number of animals in each group: randomized, tested, lost to follow-up, or died have been reported. If the experimentation involves repeated measurements, the number of animals assessed at each time point is provided, for all experimental groups.</li> <li>☒ Baseline data on assessed outcome(s) for all experimental groups have been reported.</li> <li>☒ Details on important adverse events and death of animals during the course of experimentation have been provided, for all experimental arms.</li> <li>☒ Statistical methods used have been reported.</li> <li>☒ Numeric data on outcomes have been provided in text, or in a tabular format with the main article or as supplementary tables, in addition to the figures.</li> </ul> |

|                                                      |                                                                                                                                                                                                                                                                                                                                                                                                                                                                                                                                                                                                                                                                                                                                               |
|------------------------------------------------------|-----------------------------------------------------------------------------------------------------------------------------------------------------------------------------------------------------------------------------------------------------------------------------------------------------------------------------------------------------------------------------------------------------------------------------------------------------------------------------------------------------------------------------------------------------------------------------------------------------------------------------------------------------------------------------------------------------------------------------------------------|
| Experimental details, ethics, and funding statements | <ul style="list-style-type: none"><li><input checked="" type="checkbox"/> Details on experimentation including stroke model, formulation and dosage of therapeutic agent, site and route of administration, use of anesthesia and analgesia, temperature control during experimentation, and postprocedural monitoring have been described.</li><li><input checked="" type="checkbox"/> Different sex animals have been used. If not, the reason/justification is provided.</li><li><input checked="" type="checkbox"/> Statements on approval by ethics boards and ethical conduct of studies have been provided.</li><li><input checked="" type="checkbox"/> Statements on funding and conflicts of interests have been provided.</li></ul> |
|------------------------------------------------------|-----------------------------------------------------------------------------------------------------------------------------------------------------------------------------------------------------------------------------------------------------------------------------------------------------------------------------------------------------------------------------------------------------------------------------------------------------------------------------------------------------------------------------------------------------------------------------------------------------------------------------------------------------------------------------------------------------------------------------------------------|

## References

- 1 Li WY, Choi YJ, Lee PH *et al.* Mesenchymal stem cells for ischemic stroke: changes in effects after ex vivo culturing. *Cell Transplant* 2008; **17**:1045-1059.
- 2 Rosova I, Dao M, Capoccia B, Link D, Nolte JA. Hypoxic preconditioning results in increased motility and improved therapeutic potential of human mesenchymal stem cells. *Stem Cells* 2008; **26**:2173-2182.
- 3 Pozarowski P, Darzynkiewicz Z. Analysis of cell cycle by flow cytometry. *Methods in molecular biology* 2004; **281**:301-311.
- 4 Borlongan CV, Kaneko Y, Maki M *et al.* Menstrual blood cells display stem cell-like phenotypic markers and exert neuroprotection following transplantation in experimental stroke. *Stem cells and development* 2010; **19**:439-452.
- 5 Nadareishvili Z, Hallenbeck J. Neuronal regeneration after stroke. *The New England journal of medicine* 2003; **348**:2355-2356.
- 6 Choi YJ, Li WY, Moon GJ *et al.* Enhancing trophic support of mesenchymal stem cells by ex vivo treatment with trophic factors. *J Neurol Sci* 2010; **298**:28-34.
- 7 Wang JA, He A, Hu X *et al.* Anoxic preconditioning: a way to enhance the cardioprotection of mesenchymal stem cells. *International journal of cardiology* 2009; **133**:410-412.
- 8 Pasha Z, Wang Y, Sheikh R, Zhang D, Zhao T, Ashraf M. Preconditioning enhances cell survival and differentiation of stem cells during transplantation in infarcted myocardium. *Cardiovasc Res* 2008; **77**:134-142.
